# Supplementary material for: Engineering a DNA origami mediated multicolour quantum dot platform for sub-diffraction spectral separation imaging
Source: Royal Society of Chemistry journal article supplement (doi:10.1039/d2ra04316e), 2022-01-01
Supplement: d2ra04316e1.pdf [file d2ra04316e1.pdf]

## **Supplementary Information**

### **Engineering a DNA Origami Mediated Multicolour Quantum Dots Platform for Sub-diffraction Spectral Separation Imaging**

Da Huang,<sup>a</sup> Lucy Haddad,<sup>b</sup> Fahmida Rahman,<sup>b</sup> Matteo Palma,<sup>\*a</sup> and Andrei Sapelkin<sup>\*b</sup>

<sup>a</sup> Department of Chemistry, Queen Mary University of London, London E1 4NS, United Kingdom

<sup>b</sup> Department of Physics and Astronomy, Queen Mary University of London, London E1 4NS, United Kingdom

## DNA Origami Standard

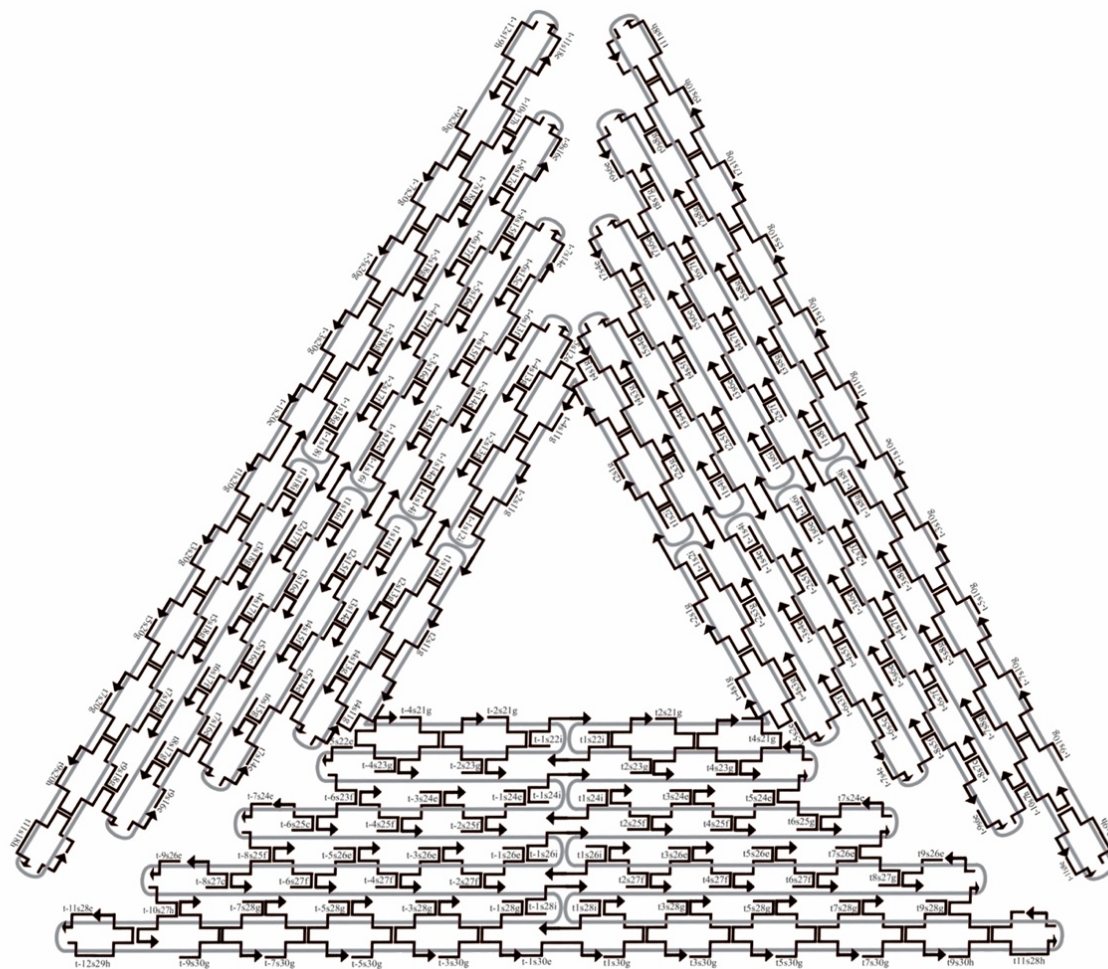

**Fig. S1** Illustration and strands map of triangular DNA origami.

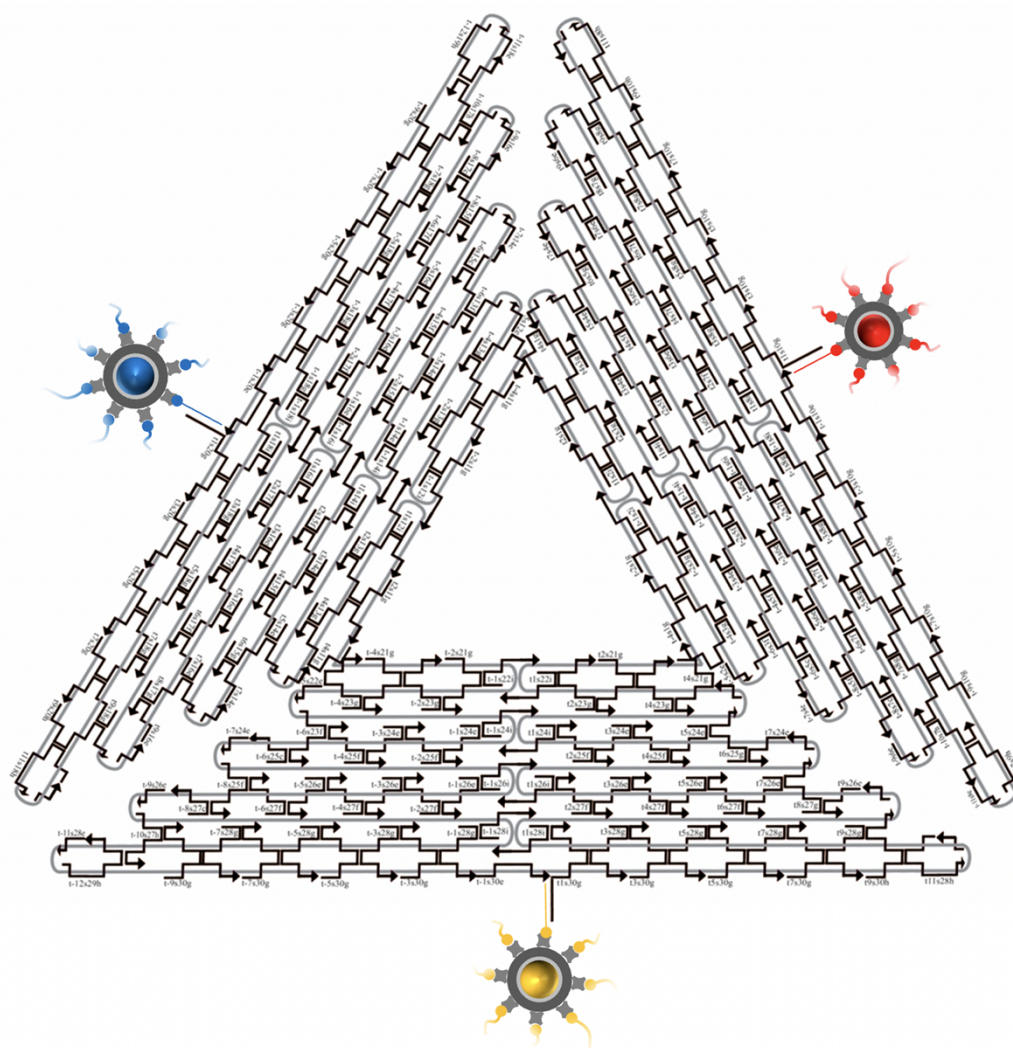

**Fig. S2** Quantum Dots modifications on triangular DNA origami.

**Table S1** List of modified staple strands

| Oligo Name        | Sequence (5'-3')                           |
|-------------------|--------------------------------------------|
| Sticky End t1s10g | AGAGAATAACATAAAAACAGGGAAGCGCATTATGTGGTGGTG |
| Sticky End t1s20g | ACAGGTAGAAAGATTCATCAGTTGAGATTTAGGCATGGGCGG |
| Sticky End t1s30g | CGAGAAAGGAAGGGAAGCGTACTATGGTTGCTAGCTTTGAGG |
| A37-ext'          | Biotin-AAAAACACCACCACA                     |
| B37-ext'          | Biotin-AAAAACCGCCCATGC                     |
| C37-ext'          | Biotin-AAAAACCTCAAAGCT                     |

**Table S2** List of unmodified staple strands

| Oligo Name | Sequence (5'-3')                            |
|------------|---------------------------------------------|
| t11s18h    | AATACTGCGGAATCGTAGGGGTAATAGTAAAATGTTTAGACT  |
| t11s28h    | TCTTTGATTAGTAATAGTCTGTCCATCACGCAAATTAACCGTT |
| t11s8h     | CAGAAGGAAACCGAGGTTTTTAAGAAAAGTAAGCAGATAGCCG |
| t1s12i     | TCATATGTGTAATCGTAAACTAGTCATTTTC             |
| t1s14i     | GTGAGAAAATGTGTAGGTAAAGATACAACCTT            |
| t1s16i     | GGCATCAAATTTGGGGCGCGAGCTAGTTAAAG            |
| t1s18i     | TTCGAGCTAAGACTTCAAATATCGGGAACGAG            |
| t1s22i     | TCGGGAGATATACAGTAACAGTACAAATAATT            |
| t1s24i     | CCTGATTAAAGGAGCGGAATTATCTCGGCCTC            |
| t1s26i     | GCAAATCACCTCAATCAATATCTGCAGGTCGA            |
| t1s28i     | CGACCAGTACATTGGCAGATTCACCTGATTGC            |
| t1s2i      | CGGGGTTTCCTCAAGAGAAGGATTTTGAATTA            |
| t1s4i      | AGCGTCATGTCTCTGAATTTACCGACTACCTT            |
| t1s6i      | TTCATAATCCCCTTATTAGCGTTTTTCTTACC            |
| t1s8i      | ATGGTTTATGTCACAATCAATAGATATTAAC             |
| t2s11g     | AGAAAAGCCCCAAAAGAGTCTGGAGCAAACAATCACCAT     |
| t2s13g     | ACAGTCAAAGAGAATCGATGAACGACCCCGTTGATAATC     |
| t2s15f     | ATAGTAGTATGCAATGCCTGAGTAGGCCGGAG            |
| t2s17f     | AACCAGACGTTTAGCTATATTTTCTTCTACTA            |
| t2s1g      | GATAAGTGCCGTCGAGCTGAAACATGAAAGTATACAGGAG    |
| t2s21g     | CCTGATTGCTTTGAATTGCGTAGATTTTCAGGCATCAATA    |
| t2s23g     | TGGCAATTTTTAACGTCAGATGAAAACAATAACGGATTTCG   |
| t2s25f     | AAGGAATTACAAGAAACCACCAGTCAGATGA             |
| t2s27f     | GGACATTCACCTCAAATATCAAACACAGTTGA            |
| t2s3g      | TTTGATGATTAAGAGGCTGAGACTTGCTCAGTACCAGGCG    |
| t2s5f      | CCGGAACCCAGAATGGAAAGCGCAACATGGCT            |
| t2s7f      | AAAGACAACATTTTCGGTCATAGCCAAAATCA            |
| t3s10g     | GTCAGAGGGTAATTGATGGCAACATATAAAAGCGATTGAG    |
| t3s14e     | CAATATGACCCTCATATATTTTAAAGCATTAA            |
| t3s16e     | CATCCAATAAATGGTCAATAACCTCGGAAGCA            |
| t3s18g     | AACTCCAAGATTGCATCAAAAAGATAATGCAGATACATAA    |
| t3s20g     | CGCCAAAAGGAATTACAGTCAGAAGCAAAGCGCAGGTCAG    |
| t3s24e     | TAATCCTGATTATCATTTTTCGGGAGAGGAAGG           |
| t3s26e     | TTATCTAAAGCATCACCTTGCTGATGGCCAAC            |
| t3s28g     | AGAGATAGTTTGACGCTCAATCGTACGTGCTTTCCTCGTT    |
| t3s30g     | AGAATCAGAGCGGGAGATGGAAATACCTACATAACCCTTC    |
| t3s4e      | TGTACTGGAAATCCTCATTAAAGCAGAGCCAC            |
| t3s6e      | CACCGGAAAGCGCGTTTTTCATCGGAAGGGCGA           |
| t3s8g      | CATTCAACAAACGCAAAGACACCAGAACACCCTGAACAAA    |
| t4s11g     | GCAAATATTTAAATTGAGATCTACAAAGGCTACTGATAAA    |
| t4s13g     | CGTTCTAGTCAGGTCATTGCCTGACAGGAAGATTGTATAA    |
| t4s15f     | CAGGCAAGATAAAAATTTTTAGAATATTCAAC            |
| t4s17f     | GATTAGAGATTAGATACATTTTCGCAAATCATA           |

|        |                                             |
|--------|---------------------------------------------|
| t4s1g  | TAGCCCGGAATAGGTGAATGCCCCCTGCCTATGGTCAGTG    |
| t4s21g | GCGCAGAGGGCGAATTAATTATTTGCACGTAAATTCTGAAT   |
| t4s23g | GATTATACACAGAAATAAAGAAATACCAAGTTACAAAATC    |
| t4s25f | TAGGAGCATAAAAGTTTGAGTAACATTGTTTTG           |
| t4s27f | TGACCTGACAAATGAAAAATCTAAAATATCTT            |
| t4s3g  | TTAACGGTTCGGAACCTATTATTAGGGTTGATATAAGTA     |
| t4s5f  | CTCAGAGCATATTCACAAACAAATTAATAAGT            |
| t4s7f  | GGAGGGAATTTAGCGTCAGACTGTCCGCCTCC            |
| t5s10g | GATAACCCACAAGAATGTTAGCAAACGTAGAAAATTATTC    |
| t5s14e | TTAATGCCTTATTTCAACGCAAGGGCAAAGAA            |
| t5s16e | TTAGCAAATAGATTTAGTTTGACCAGTACCTT            |
| t5s18g | TAATTGCTTTACCTGACTATTATGAGGCATAGTAAGAGC     |
| t5s20g | AACACTATCATAACCCATCAAAAATCAGGTCTCCTTTTGA    |
| t5s24e | AATGGAAGCGAACGTTATTAATTTCTAACAAC            |
| t5s26e | TAATAGATCGCTGAGAGCCAGCAGAAGCGTAA            |
| t5s28g | GAATACGTAACAGGAAAAACGCTCCTAACAGGAGGCCGA     |
| t5s30g | TTAAAGGGATTTTAGATACCGCCAGCCATTGCGGCACAGA    |
| t5s4e  | CCTTGAGTCAGACGATTGGCCTTGCGCCACCC            |
| t5s6e  | TCAGAACCCAGAATCAAGTTTGCCGGTAAATA            |
| t5s8g  | TTGACGGAAATACATACATAAAGGGCGCTAATATCAGAGA    |
| t6s15g | ATAAAGCCTTTGCGGGAGAAGCCTGGAGAGGGTAG         |
| t6s17f | TAAGAGGTCAATTCTGCGAACGAGATTAAGCA            |
| t6s25g | TCAATAGATATTAATCCTTTGCCGGTTAGAACCT          |
| t6s27f | CAATATTTGCCTGCAACAGTGCCATAGAGCCG            |
| t6s5g  | CAGAGCCAGGAGGTTGAGGCAGGTAACAGTGCCCG         |
| t6s7f  | ATTAAGGCCGTAATCAGTAGCGAGCCACCTT             |
| t7s10g | ATAAGAGCAAGAAACATGGCATGATTAAGACTCCGACTTG    |
| t7s14e | ATGACCCTGTAATACTTCAGAGCA                    |
| t7s16e | TAAAGCTATATAACAGTTGATTCCCATTTTTG            |
| t7s18g | CGGATGGCACGAGAATGACCATAATCGTTTACCAGACGAC    |
| t7s20g | GATAAAAACCAAAATATTAACAGTTCAGAAATTAGAGCT     |
| t7s24e | ACAATTCGACAACCTCGTAATACAT                   |
| t7s26e | TTGAGGATGGTCAGTATTAACACCTTGAATGG            |
| t7s28g | CTATTAGTATATCCAGAACAATATCAGGAACGGTACGCCA    |
| t7s30g | GAATCCTGAGAAGTGTATCGGCCTTGCTGGTACTTTAATG    |
| t7s4e  | GCCGCCAGCATTGACACCACCCTC                    |
| t7s6e  | AGAGCCGCACCATCGATAGCAGCATGAATTAT            |
| t7s8g  | CACCGTCACCTTATTACGCAGTATTGAGTTAAGCCCAATA    |
| t8s17g | TAATTGCTTGGAAGTTTCATTCCAAATCGGTTGTA         |
| t8s27g | CGCGAACTAAAACAGAGGTGAGGCTTAGAAGTATT         |
| t8s7g  | AGCCATTTAAACGTCACCAATGAACACCAGAACCA         |
| t9s10h | TATCTTACCGAAGCCCAAACGCAATAATAACGAAAATCACCAG |
| t9s16e | ACTAAAGTACGGTGTGCAATATAA                    |
| t9s18g | TGCTGTAGATCCCCCTCAAATGCTGCGAGAGGCTTTTGCA    |
| t9s20h | AAAGAAGTTTTGCCAGCATAAATATTCATTGACTCAACATGTT |
| t9s26e | ACCACCAGCAGAAGATGATAGCCC                    |

|         |                                              |
|---------|----------------------------------------------|
| t9s28g  | TAAAACATTAGAAGAACTCAAACCTTTTTATAATCAGTGAG    |
| t9s30h  | GCCACCGAGTAAAAGAACATCACTTGCCTGAGCGCCATTA AAA |
| t9s6e   | CCATTAGCAAGGCCGGGGGAATTA                     |
| t9s8g   | GAGCCAGCGAATACCCAAAAGAACATGAAATAGCAATAGC     |
| t10s17h | ACCAACCTAAAAAATCAACGTAACAAATAAATTGGGCTTGAGA  |
| t10s27h | AACTCACATTATTGAGTGTGTTCCAGAAACCGTCTATCAGGG   |
| t10s7h  | ACGACAATAAATCCCGACTTGC GGGAGATCCTGAATCTTACCA |
| t12s19h | CCTGACGAGAAACACCAGAACGAGTAGGCTGCTCATT CAGTGA |
| t12s29h | ACGTGGACTCCAACGTCAAAGGGCGAATTTGGAACAAGAGTCC  |
| t12s9h  | TGCTATTTTGCACCCAGCTACAATTTTGT TTTGAAGCCTTAAA |
| t1s10e  | AGAGAATAACATAAAAAACAGGGAAGCGCATT A           |
| t1s12i  | AGGGATAGCTCAGAGCCACCACCCCATGTCAA             |
| t1s14e  | ATTTTCTGTCAGCGGAGTGAGAATACCGATAT             |
| t1s14i  | CAACAGTTTATGGGATTTTGCTAATCAA AAGG            |
| t1s16e  | ATTCGGTCTGCGGGATCGTCACCCGAAATCCG             |
| t1s16i  | GCCGCTTTGCTGAGGCTTGCAGGGGAAAAGGT             |
| t1s18g  | CGACCTGCGGTCAATCATAAGGGAACGGAACAACATTATT     |
| t1s18i  | GCGCAGACTCCATGTTACTTAGCCCGTTTTAA             |
| t1s20e  | ACAGGTAGAAAGATTCATCAGTTGAGATTTAG             |
| t1s22i  | CGCGTCTGATAGGAACGCCATCAACTTTTACA             |
| t1s24e  | CAGTTTGACGCACTCCAGCCAGCTAAACGACG             |
| t1s24i  | AGGAAGATGGGGACGACGACAGTAATCATATT             |
| t1s26e  | GCCAGTGCGATCCCCGGGTACCGAGTTTTTCT             |
| t1s26i  | CTCTAGAGCAAGCTTGCATGCCTGGTCAGTTG             |
| t1s28g  | TTTCACCAGCCTGGCCCTGAGAGAAAGCCGGCGAACGTGG     |
| t1s28i  | CCTTCACCGTGAGACGGGCAACAGCAGTCACA             |
| t1s2i   | CCTTTTTTCATTTAACAATTTTCATAGGATTAG            |
| t1s30e  | CGAGAAAGGAAGGGAAGCGTACTATGGTTGCT             |
| t1s4e   | TTATCAAACCGGCTTAGGTTGGGTAAGCCTGT             |
| t1s4i   | TTAACCTATCATAGGTCTGAGAGTTCCAGTA              |
| t1s6e   | TTAGTATCGCCAACGCTCAACAGTCGGCTGTC             |
| t1s6i   | AGTATAAAATATGCGTTATACAAAGCCATCTT             |
| t1s8g   | TTTCCTTAGCACTCATCGAGAACAATAGCAGCCTTTACAG     |
| t1s8i   | CAAGTACCTCATTCCAAGAACGGGAAATTCAT             |
| t2s11g  | CCTCAGAACCGCCACCCAAGCCCAATAGGAACGTAAATGA     |
| t2s13g  | AGACGTTACCATGTACCGTAACACCCTCAGAACCGCCAC      |
| t2s15f  | CACGCATAAGAAAGGAACAAC TAAGTCTTTCC            |
| t2s17f  | ATTGTGTCTCAGCAGCGAAAGACACCATCGCC             |
| t2s1g   | AAAACAAAATTAATTAATGGAAACAGTACATTAGTGAAT      |
| t2s21g  | GCTCATTTTTTAACCAGCCTTCTGTAGCCAGGCATCTGC      |
| t2s23g  | GTAACCGTCTTTCATCAACATTA AAAATTTTTGTTAAATCA   |
| t2s25f  | ACGTTGTATTCCGGCACCGCTTCTGGCGCATC             |
| t2s27f  | CCAGGGTGGCTCGAATTCGTAATCCAGTCACG             |
| t2s3g   | AGAGTCAAAAATCAATATATGTGATGAAACAAACATCAAG     |
| t2s5f   | ACTAGAAATATAACTATATGTACGCTGAGA               |
| t2s7f   | TCAATAATAGGGCTTAATTGAGAATCATAATT             |

|        |                                          |
|--------|------------------------------------------|
| t3s10g | AACGTCAAAAATGAAAAGCAAGCCGTTTTTATGAAACCAA |
| t3s14e | GTTTTGTCAGGAATTGCGAATAATCCGACAAT         |
| t3s16e | GACAACAAGCATCGGAACGAGGGTGAGATTTG         |
| t3s18g | TATCATCGTTGAAAGAGGACAGATGGAAGAAAAATCTACG |
| t3s20g | TTAATAAAACGAACTAACCGAACGACCAACTCCTGATAA  |
| t3s24e | TGTAGATGGGTGCCGGAACCAGGAACGCCAG          |
| t3s26e | GGTTTTCCATGGTCATAGCTGTTTGAGAGGCG         |
| t3s28g | GTTTGCGTCACGCTGGTTTGCCCAAGGGAGCCCCGATT   |
| t3s30g | TAGAGCTTGACGGGAGTTGCAGCAAGCGGTCATTGGGCG  |
| t3s4e  | GATTAAGAAATGCTGATGCAAATCAGAATAAA         |
| t3s6e  | CACCGGAATCGCCATATTTAACAAAATTTACG         |
| t3s8g  | AGCATGTATTTTCATCGTAGGAATCAAACGATTTTTTGT  |
| t4s11g | AGGTTTAGTACCGCCATGAGTTTCGTCACCAGGATCTAAA |
| t4s13g | AGCGTAACTACAACTACAACGCCTATCACCGTACTCAGG  |
| t4s15f | TAGTTGCGAATTTTTTACGTTGATCATAGTT          |
| t4s17f | GTACAACGAGCAACGGCTACAGAGGATACCGA         |
| t4s1g  | GAGCAAAAGAAGATGAGTGAATAACCTTGCTTATAGCTTA |
| t4s21g | GTTAAAATTCGCATTAATGTGAGCGAGTAACACACGTTGG |
| t4s23g | GGATAGGTACCCGTCGGATTCTCCTAAACGTTAATATTTT |
| t4s25f | AGTTGGGTCAAAGCGCCATTCGCCCGTAATG          |
| t4s27f | CGCGCGGGCCTGTGTGAAATTGTTGGCGATTA         |
| t4s3g  | ACATAGCGCTGTAATCGTCGCTATTCATTTCAATTACCT  |
| t4s5f  | GTTAAATACAATCGCAAGACAAAGCCTTGAAA         |
| t4s7f  | CCCATCCTCGCCAACATGTAATTTAATAAGGC         |
| t5s10g | TCCAATCCAATAAGATTACCGCGCCAATAAATAATAT    |
| t5s16e | AACAGCTTGCTTTGAGGACTAAAGCGATTATA         |
| t5s18g | CCAAGCGCAGGCGCATAGGCTGGCAGAAGTGGCTCATTAT |
| t5s20g | ACCAGTCAGGACGTTGGAACGGTGTACAGACCGAAACAAA |
| t5s26e | TGCTGCAAATCCGCTCACAATCCCAGCTGCA          |
| t5s28g | TTAATGAAGTTTGATGGTGGTTCCGAGGTGCCGTAAAGCA |
| t5s30g | CTAAATCGGAACCCTAAGCAGGCGAAAATCCTTCGGCCAA |
| t5s6e  | GTGTGATAAGGCAGAGGCATTTTCAGTCCTGA         |
| t5s8g  | ACAAGAAAGCAAGCAAATCAGATAACAGCCATATTATTTA |
| t6s13f | ACAGACAGCCCAAATCTCCAAAAAAAATTTCTTA       |
| t6s15c | CGAGGTGAGGCTCCAAAAGGAGCC                 |
| t6s17f | ACCCCAGACTTTTTTCATGAGGAACTTGCTTT         |
| t6s23f | CGGCGGATTGAATTCAGGCTGCGCAACGGGGGATG      |
| t6s25c | TGGCGAAATGTTGGGAAGGGCGAT                 |
| t6s27f | TGTCGTGCACACAACATACGAGCCACGCCAGC         |
| t6s3f  | TCCCTTAGAATAACGCGAGAAAATTTTACCGACC       |
| t6s5c  | GTTTGAAATTCAAATATATTTTAG                 |
| t6s7f  | AATAGATAGAGCCAGTAATAAGAGATTTAATG         |
| t7s10g | GCCAGTTACAAAATAATAGAAGGCTTATCCGGTTATCAAC |
| t7s18g | AAAACACTTAATCTTGACAAGAAGTAAATCATTGTGAATT |
| t7s20g | ACCTTATGCGATTTTATGACCTTCATCAAGAGCATCTTTG |
| t7s28g | TTCCAGTCCTTATAAATCAAAGAGAACCATCACCCAAAT  |

|                  |                                          |
|------------------|------------------------------------------|
| t7s30g           | CAAGTTTTTTGGGGTCGAAATCGGCAAATCCGGGAAACC  |
| t7s8g            | GCGCCTGTTATTCTAAGAACGCGATTCCAGAGCCTAATTT |
| t8s15f           | CGGTTTATCAGGTTTCCATTAACGGGAATACACT       |
| t8s17c           | GGCAAAGTAAATACGTAATGCC                   |
| t8s25f           | TCTTCGCTATTGGAAGCATAAAGTGTATGCCCGCT      |
| t8s27c           | GCGCTCACAAGCCTGGGGTGCCTA                 |
| t8s5f            | TTCTGACCTAAAATATAAAGTACCGACTGCAGAAC      |
| t8s7c            | TCAGCTAAAAAAGGTAAAGTAATT                 |
| t9s10g           | ACGCTAACGAGCGTCTGGCGTTTTAGCGAACCCAACATGT |
| t9s20g           | TGGTTTAATTTCAACTCGGATATTCATTACCCACGAAAGA |
| t9s30g           | CGATGGCCCACTACGTATAGCCCGAGATAGGGATTGCGTT |
| tsrem1           | GCGCTTAATGCGCCGCTACAGGGC                 |
| t5s2et6s23c3T    | TTAATTAATTTTTTACCATATCAAA                |
| t7s4et8s25c2T    | TTAATTTTCATCTTAGACTTTACAA                |
| t9s6et10s27c1T   | CTGTCCAGACGTATACCGAACGA                  |
| t11s8et12s29c0T  | TCAAGATTAGTGTAGCAATACT                   |
| t5s12et6s3c3T    | TGTAGCATTCTTTTATAAACAGTT                 |
| t7s14et8s5c2T    | TTTAATTGTATTTCCACCAGAGCC                 |
| t9s16et10s7c1T   | ACTACGAAGGCTTAGCACCATTA                  |
| t11s18et12s9c0T  | ATAAGGCTTGCAACAAAGTTAC                   |
| t5s22et6s13c-T   | GTGGGAACAAATTTCTATTTTTGAG                |
| t7s24et8s15c2T   | CGGTGCGGGCCTTCCAAAAACATT                 |
| t9s26et10s17c1T  | ATGAGTGAGCTTTTAAATATGCA                  |
| t11s28et12s19c0T | ACTATTAAGAGGATAGCGTCC                    |



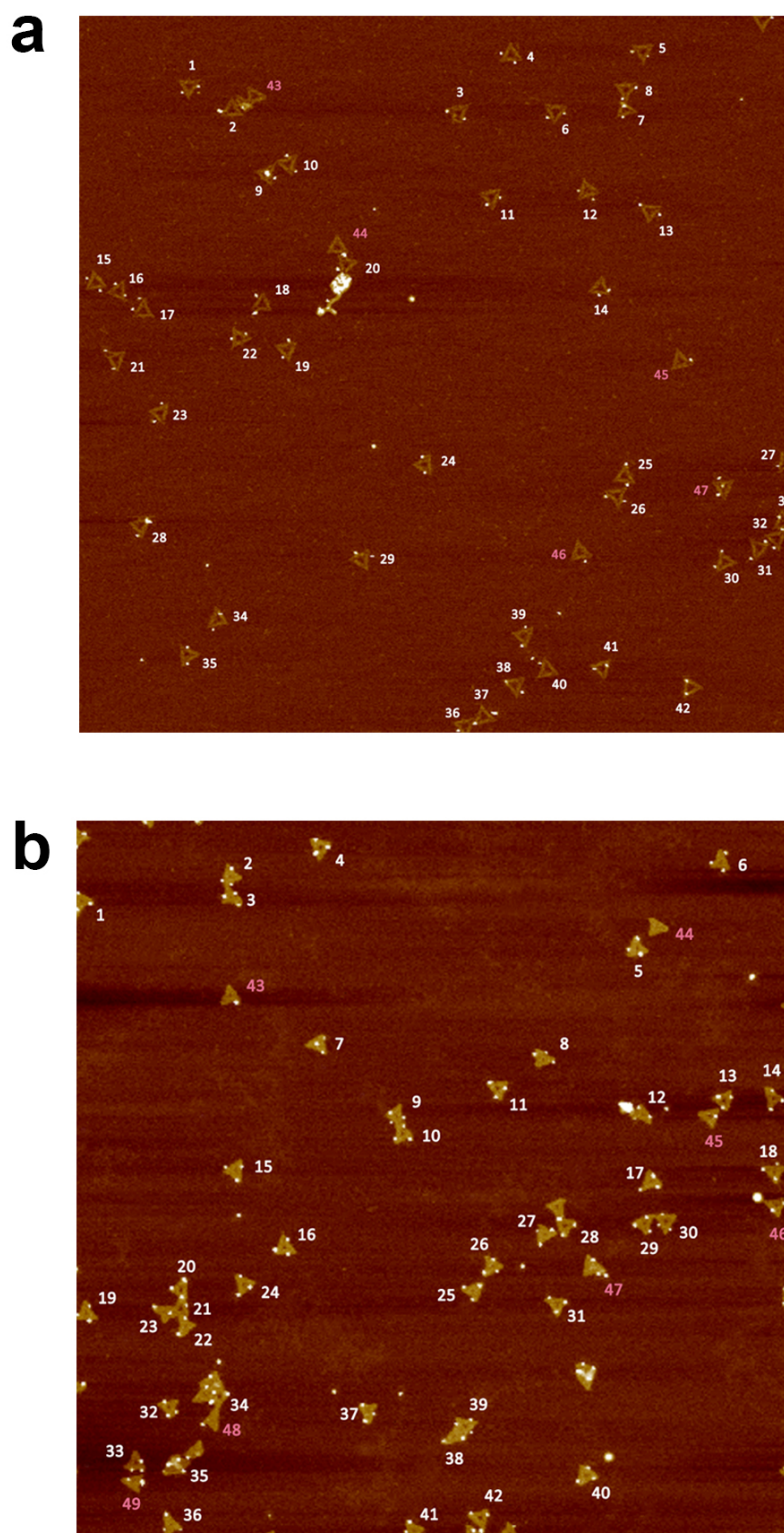

**Fig. S3** Yielding Statistics of QD(s) modified DNA origami. a) Sample of counting for two QDs modified DNA origami, yielding 89%; b) Sample of three QDs modified DNA origami, yielding 86%. The cross-section was measured and analysed as QD spacing distribution in the following tables.

**Table S3** Analysis QD spacing on  
2-QDs-bound DNA origami

| QD Spacing (nm) | Probability (%) |
|-----------------|-----------------|
| 30 $\pm$ 5      | 0.0             |
| 40 $\pm$ 5      | 1.1             |
| 50 $\pm$ 5      | 6.5             |
| 60 $\pm$ 5      | 24.8            |
| 70 $\pm$ 5      | 37.6            |
| 80 $\pm$ 5      | 21.5            |
| 90 $\pm$ 5      | 7.9             |
| 100 $\pm$ 5     | 0.6             |
| 110 $\pm$ 5     | 0.0             |

**Table S4** Analysis QD spacing on  
3-QDs-bound DNA origami

| QD Spacing (nm) | Probability (%) |
|-----------------|-----------------|
| 30 $\pm$ 5      | 0               |
| 40 $\pm$ 5      | 0.8             |
| 50 $\pm$ 5      | 8.5             |
| 60 $\pm$ 5      | 31.8            |
| 70 $\pm$ 5      | 37.7            |
| 80 $\pm$ 5      | 17.3            |
| 90 $\pm$ 5      | 3.2             |
| 100 $\pm$ 5     | 0.7             |
| 110 $\pm$ 5     | 0.0             |

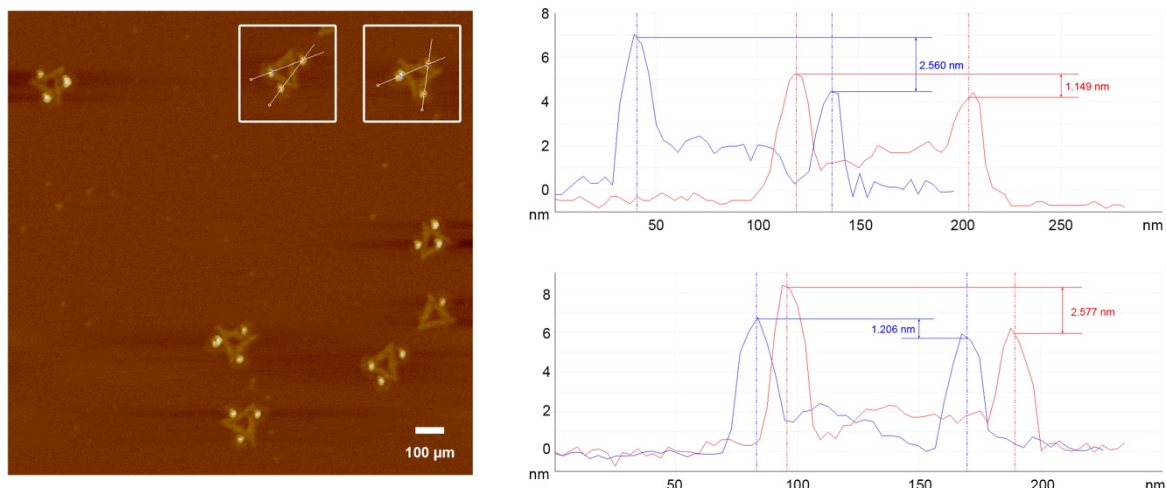

**Fig. S4** AFM topographical images and corresponding height profiles of the QDs attached to DNA origami, demonstrating the difference between the height (and hence the size of QDs). Height profiles show that all QDs on each DNA-origami are of different size and that we achieved targeted attachment of three different QDs on the same DNA origami.

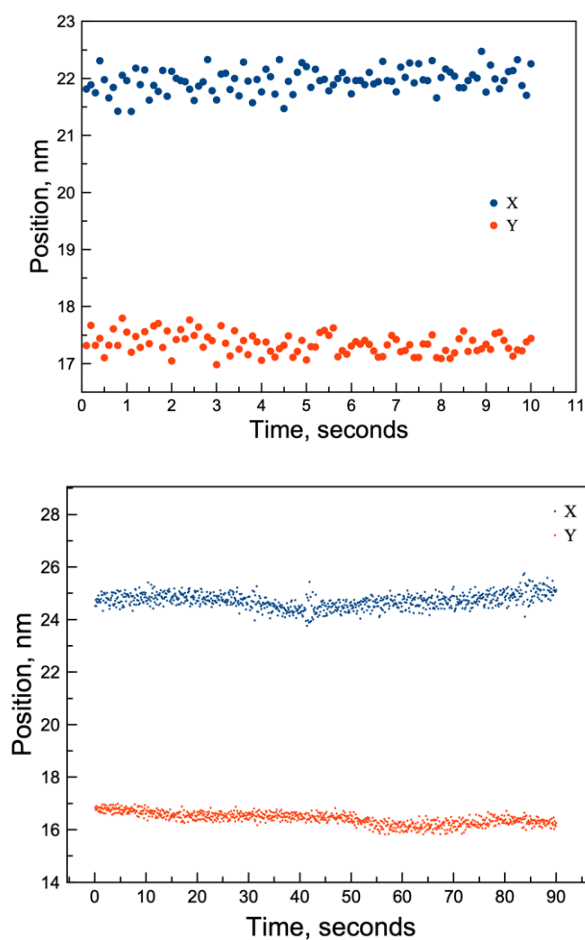

**Fig. S5** Quantum Dot-Based Optical Spectral Separation (QDOSS) Microscopy drift analysis for the positioning system.

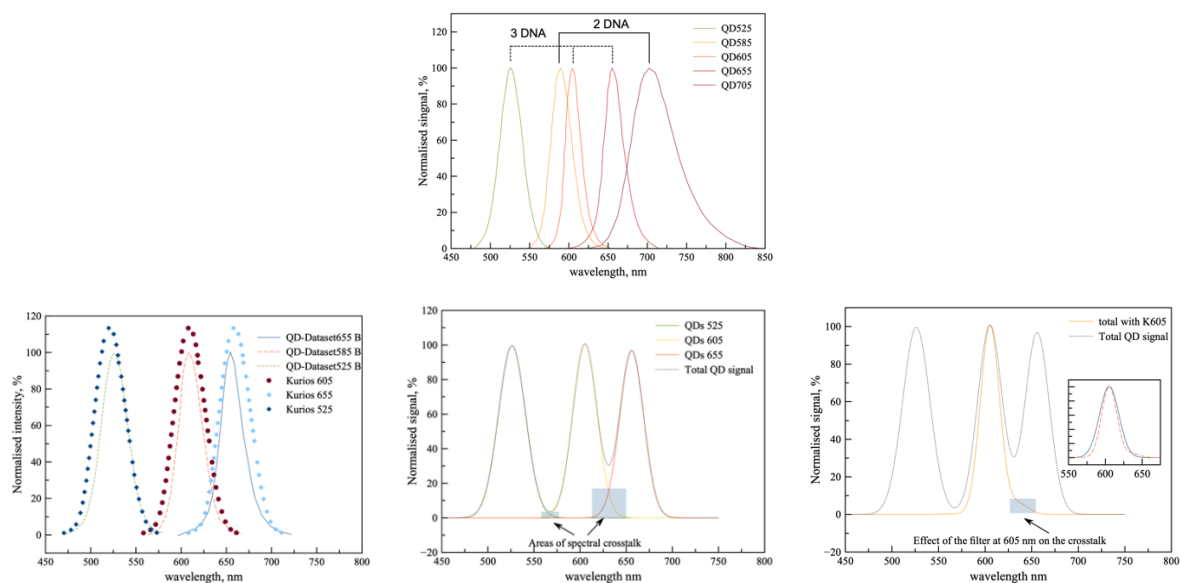

**Fig. S6** Top row: Emission spectra of quantum dots used in this study. Bottom row: matching between the Kurios WB-1 filter and emission profiles for 3 DNA labelling; spectral crosstalk and effect of the filter centred at 605 nm on the corresponding QD emission peak. Inset shows the difference between the original emission at 605 nm (solid line) and that after the filter is applied to the total signal from all 3 QDs: the difference illustrates the level of the crosstalk between spectral channels.

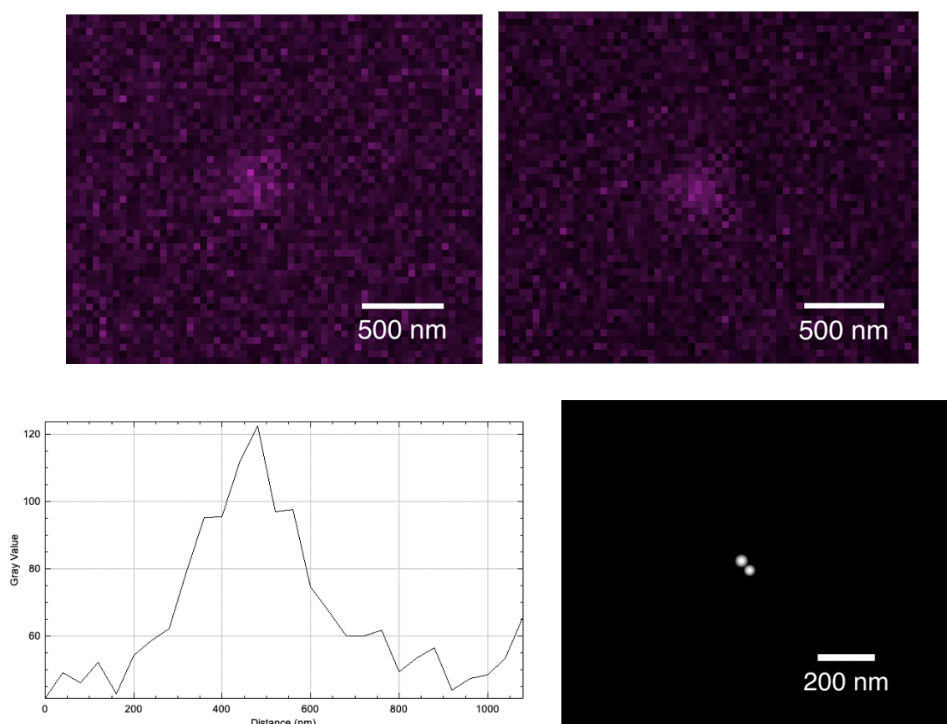

**Fig. S7** Top row: Diffraction limited 2 DNA images collected at 585 and 705 nm. Bottom row: the corresponding intensity profile for one of the images illustrating the signal-to-noise ratio and super-resolution (following spectral separation and data analysis) image of triangular DNA origami with two colour QDs. Please see also see attached numerical analysis data tables.

**Table S5.** GDSC SMLM Peak fitting plugin output data for 2 DNA system above.

| Source Frame | origX | origY | origValue | Error    | Noise   | SNR     | Background | +/-       | Signal  | +/-     | X       | +/-      | Y       | +/-      | Precision (nm) |
|--------------|-------|-------|-----------|----------|---------|---------|------------|-----------|---------|---------|---------|----------|---------|----------|----------------|
| Stack: 1     | 28    | 27    | 146       | 0.408584 | 4.03546 | 213.405 | 9.07881    | 0.0143371 | 861.186 | 2.86451 | 1173.21 | 0.465761 | 1061.77 | 0.465779 | 9.95043        |
| Stack: 2     | 27    | 25    | 95        | 0.320312 | 4.3733  | 180.731 | 11.3236    | 0.014343  | 790.391 | 2.86569 | 1122.6  | 0.507444 | 1002.68 | 0.507435 | 11.3625        |

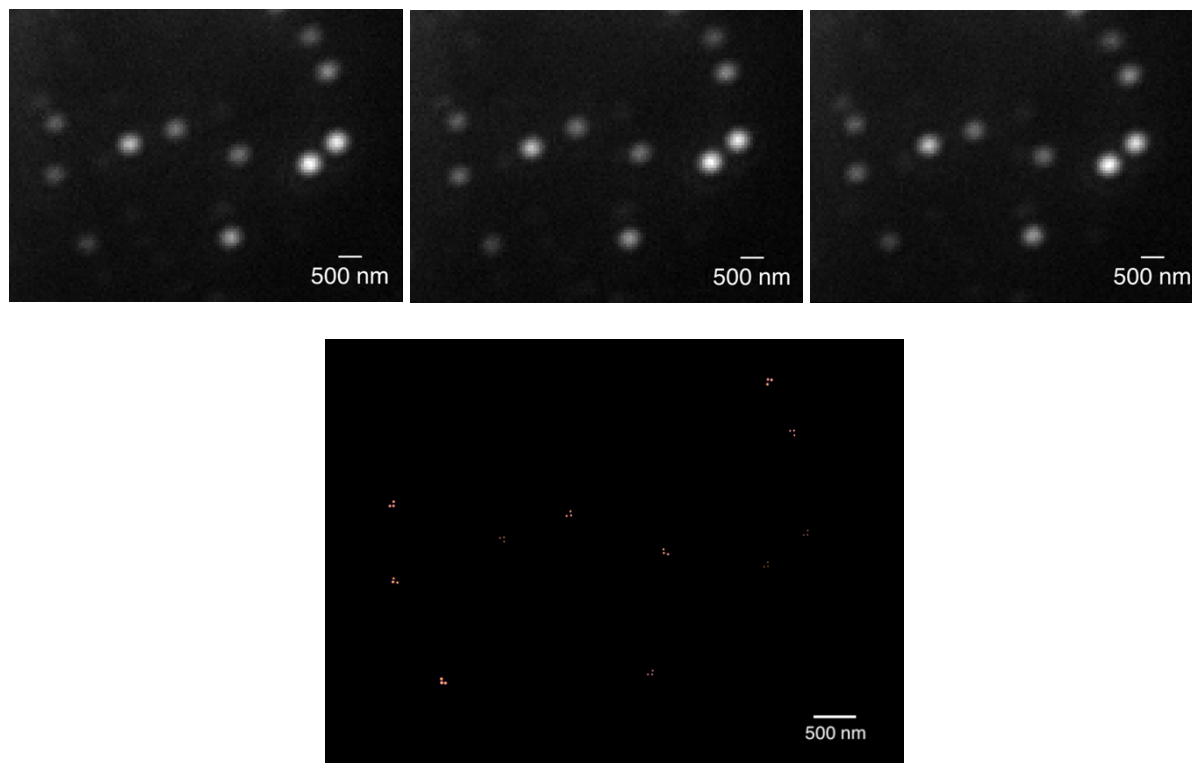**Fig. S8** Diffraction limited (top row) and the corresponding super-resolution (following spectral separation and data analysis) images of triangular DNA origami with three colour (525, 606 and 655 nm) QDs. Please also see attached numerical analysis data tables.**Table S6.** GDSC SMLM Peak fitting plugin output data for 3 DNA system above.

| Source Frame | origX | origY | origValue | Error    | Noise   | SNR     | Background | +/-       | Signal  | +/-     | X       | +/-       | Y       | +/-       | Precision (nm) |
|--------------|-------|-------|-----------|----------|---------|---------|------------|-----------|---------|---------|---------|-----------|---------|-----------|----------------|
| Stack: 3     | 107   | 54    | 1963      | 0.966065 | 4.48856 | 3985.86 | 434.016    | 0.0280842 | 17890.8 | 5.18112 | 6905.06 | 0.0640306 | 3543.63 | 0.0639007 | 2.0473         |
| Stack: 3     | 116   | 47    | 1912      | 0.968024 | 4.48856 | 3667.13 | 431.439    | 0.0279078 | 16460.1 | 5.1678  | 7523.07 | 0.0696649 | 3049.13 | 0.0695157 | 2.14588        |
| Stack: 3     | 43    | 47    | 1728      | 0.929255 | 4.48856 | 2583.62 | 442.227    | 0.025246  | 11596.7 | 5.04408 | 2787.29 | 0.0981505 | 3089.97 | 0.0981515 | 2.627          |
| Stack: 3     | 79    | 81    | 1612      | 0.922469 | 4.48856 | 2110.32 | 434.305    | 0.0252446 | 9472.31 | 5.04379 | 5097.58 | 0.120166  | 5228.96 | 0.120165  | 2.9645         |
| Stack: 3     | 113   | 22    | 1528      | 0.913142 | 4.48856 | 1751.82 | 441.148    | 0.0252464 | 7863.16 | 5.04417 | 7312.73 | 0.144753  | 1423.77 | 0.144756  | 3.32316        |
| Stack: 3     | 59    | 42    | 1471      | 0.920812 | 4.48856 | 1455.49 | 445.586    | 0.0252481 | 6533.03 | 5.0445  | 3834.8  | 0.174224  | 2747.08 | 0.174224  | 3.73506        |
| Stack: 3     | 81    | 51    | 1425      | 0.916522 | 4.48856 | 1406.23 | 441.653    | 0.0252466 | 6311.95 | 5.0442  | 5280.65 | 0.18033   | 3334.86 | 0.180328  | 3.81844        |
| Stack: 3     | 16    | 39    | 1368      | 0.721167 | 4.48856 | 941.381 | 453.513    | 0.0252425 | 4225.44 | 5.04338 | 1063.42 | 0.269372  | 2598.42 | 0.269396  | 4.98575        |
| Stack: 3     | 106   | 9     | 1361      | 0.774546 | 4.48856 | 1010.74 | 449.632    | 0.025245  | 4536.75 | 5.04387 | 6905.54 | 0.250898  | 625.866 | 0.250889  | 4.74942        |
| Stack: 2     | 107   | 53    | 1979      | 0.964643 | 4.45067 | 3924.41 | 434.803    | 0.0280659 | 17466.3 | 5.1818  | 6903.19 | 0.0655538 | 3480.2  | 0.0654275 | 2.07294        |
| Stack: 1     | 106   | 54    | 2007      | 0.961768 | 4.49544 | 4081.82 | 434.059    | 0.0280478 | 18349.6 | 5.17923 | 6848.76 | 0.0624245 | 3549.71 | 0.0623003 | 2.01878        |
| Stack: 3     | 16    | 58    | 1325      | 0.845301 | 4.48856 | 887.122 | 447.604    | 0.0252477 | 3981.9  | 5.04441 | 1054.99 | 0.285847  | 3786.28 | 0.285848  | 5.19445        |
| Stack: 2     | 116   | 46    | 1943      | 0.966672 | 4.45067 | 3662.22 | 432.108    | 0.0279025 | 16299.3 | 5.16901 | 7526.11 | 0.0703213 | 2984.2  | 0.0701719 | 2.15542        |
| Stack: 1     | 115   | 47    | 1909      | 0.966448 | 4.49544 | 3476.15 | 432.104    | 0.0279356 | 15626.8 | 5.16928 | 7464.6  | 0.0733835 | 3052.75 | 0.0732228 | 2.21063        |
| Stack: 2     | 43    | 48    | 1779      | 0.93806  | 4.45067 | 2682.91 | 442.622    | 0.0252459 | 11940.7 | 5.04406 | 2790.38 | 0.0953225 | 3157.21 | 0.0953243 | 2.5784         |
| Stack: 3     | 28    | 82    | 1262      | 0.853982 | 4.48856 | 706.843 | 438.376    | 0.0252437 | 3172.71 | 5.04363 | 1815.18 | 0.358758  | 5360.27 | 0.35877   | 6.1008         |
| Stack: 1     | 42    | 48    | 1805      | 0.931149 | 4.49544 | 2756.09 | 442.957    | 0.0252459 | 12389.8 | 5.04406 | 2725.24 | 0.0918674 | 3099.93 | 0.091869  | 2.52758        |
| Stack: 2     | 77    | 81    | 1566      | 0.923266 | 4.45067 | 2069.49 | 434.919    | 0.025244  | 9210.61 | 5.04368 | 5033.91 | 0.123581  | 5230.38 | 0.123579  | 3.00984        |
| Stack: 1     | 79    | 80    | 1589      | 0.92208  | 4.49544 | 2124.62 | 434.672    | 0.0252463 | 9551.09 | 5.04414 | 5107.36 | 0.119172  | 5170.5  | 0.119173  | 2.95063        |
| Stack: 1     | 113   | 23    | 1564      | 0.918996 | 4.49544 | 1858.22 | 440.622    | 0.0252474 | 8353.53 | 5.04437 | 7317.98 | 0.136255  | 1497.22 | 0.136257  | 3.20217        |
| Stack: 2     | 112   | 22    | 1509      | 0.915424 | 4.45067 | 1817.95 | 440.843    | 0.025247  | 8091.08 | 5.04428 | 7252.42 | 0.140675  | 1427.73 | 0.140677  | 3.25823        |
| Stack: 1     | 58    | 42    | 1443      | 0.919469 | 4.49544 | 1408.16 | 445.969    | 0.0252476 | 6330.32 | 5.0444  | 3765.18 | 0.179804  | 2756.2  | 0.179804  | 3.81298        |
| Stack: 2     | 59    | 41    | 1453      | 0.932065 | 4.45067 | 1430    | 446.433    | 0.0252478 | 6364.45 | 5.04444 | 3825.88 | 0.17884   | 2683.99 | 0.178839  | 3.78907        |
| Stack: 1     | 82    | 52    | 1399      | 0.912541 | 4.49544 | 1365.74 | 441.898    | 0.0252444 | 6139.62 | 5.04376 | 5347.34 | 0.185392  | 3353.42 | 0.185395  | 3.88891        |
| Stack: 2     | 81    | 50    | 1435      | 0.916666 | 4.45067 | 1477.41 | 441.746    | 0.0252465 | 6575.48 | 5.04418 | 5275.53 | 0.173102  | 3278.35 | 0.173102  | 3.71093        |
| Stack: 1     | 15    | 39    | 1355      | 0.704126 | 4.49544 | 970.004 | 455.306    | 0.0252419 | 4360.6  | 5.04325 | 1007.01 | 0.261024  | 2600.67 | 0.261049  | 4.88205        |
| Stack: 2     | 17    | 58    | 1416      | 0.872729 | 4.45067 | 1188.54 | 446.043    | 0.025247  | 5289.8  | 5.04428 | 1124.63 | 0.215172  | 3796.47 | 0.215175  | 4.27317        |
| Stack: 1     | 16    | 57    | 1400      | 0.876469 | 4.49544 | 1162.29 | 446.752    | 0.0252469 | 5224.99 | 5.04426 | 1064.3  | 0.21784   | 3733.31 | 0.217844  | 4.32213        |
| Stack: 2     | 16    | 38    | 1354      | 0.762224 | 4.45067 | 973.37  | 453.346    | 0.0252427 | 4332.15 | 5.04341 | 1064.97 | 0.262377  | 2533.22 | 0.26276   | 4.88599        |
| Stack: 1     | 106   | 10    | 1336      | 0.783521 | 4.49544 | 951.216 | 448.923    | 0.0252453 | 4276.14 | 5.04394 | 6897.24 | 0.266185  | 701.198 | 0.266183  | 4.94791        |
| Stack: 2     | 107   | 9     | 1334      | 0.786136 | 4.45067 | 922.61  | 448.076    | 0.0252456 | 4106.23 | 5.04401 | 6962.07 | 0.277199  | 632.518 | 0.277195  | 5.0687         |
| Stack: 1     | 27    | 81    | 1283      | 0.837693 | 4.49544 | 744.335 | 438.755    | 0.0252411 | 3346.12 | 5.04309 | 1810.91 | 0.340176  | 5300.18 | 0.340182  | 5.87579        |
| Stack: 2     | 29    | 83    | 1263      | 0.86585  | 4.45067 | 793.137 | 437.701    | 0.0252454 | 3529.99 | 5.04397 | 1872.71 | 0.322445  | 5366.22 | 0.322445  | 5.6326         |
